# Supplementary material for: Epidemiologic Factors Supporting Triage of Infected Dog Patients Admitted to a Veterinary Hospital Biological Isolation and Containment Unit
Source: MDPI journal article supplement (doi:10.3390/vetsci10030186), 2023-03-01
Supplement: s1 [file s1]

Table S1: Epidemiological data from the studied population.

| ID  | Breed       | Gender | Neuter | Age  | Vaccine Status | Season | Classification | Clinical Presentation | Infectious Diagnosis | Concomitant Disorders | Hospitalization outcome | Number of Hospitalizations | Final Outcome |
|-----|-------------|--------|--------|------|----------------|--------|----------------|-----------------------|----------------------|-----------------------|-------------------------|----------------------------|---------------|
| 1   | Mixed Breed | M      | N      | 0.2  | Not up to date | Warm   | Suspect        | Gastroenteritis       |                      | N                     | Discharge               | 1                          |               |
| 2   | Breed       | F      | N      | 0.3  | Not up to date | Warm   | Suspect        | Gastroenteritis       |                      | N                     | Discharge               | 1                          |               |
| 3   | Mixed Breed | F      | N      | 6.0  |                | Warm   | Infectious     | Dermatitis            | Dermatophytosis      | Y                     | Dead                    | 1                          | Dead          |
| 4   | Breed       | M      | N      | 9.0  | Up to date     | Warm   | Infectious     | MDR                   |                      | Y                     | Discharge               | 1                          | Dead          |
| 5   | Breed       | M      | N      | 0.6  | Not up to date | Cold   | Suspect        | Gastroenteritis       |                      | N                     | Discharge               | 1                          |               |
| 6   | Mixed Breed | M      | N      | 0.3  | Not up to date | Cold   | Infectious     | Gastroenteritis       | Parvovirus           | Y                     | Dead                    | 1                          | Dead          |
| 7   | Breed       | M      | N      | 0.3  | Not up to date | Cold   | Suspect        | Gastroenteritis       |                      | N                     | Discharge               | 1                          |               |
| 8   | Breed       | M      | N      | 7.0  | Not up to date | Cold   | Not Infectious | Leptospirosis         |                      | Y                     | Discharge               | 1                          |               |
| 9   | Mixed Breed | M      | N      | 0.3  | Not up to date | Cold   | Infectious     | Gastroenteritis       | Parvovirus           | N                     | Discharge               | 1                          | Discharge     |
| 10  | Breed       | M      | N      | 0.8  | Up to date     | Cold   | Not Infectious | Distemper             |                      | Y                     | Discharge               | 1                          |               |
| 11  | Mixed Breed | F      | N      | 0.6  | Not up to date | Cold   | Suspect        | Gastroenteritis       |                      | N                     | Dead                    | 1                          |               |
| 12  | Mixed Breed | F      | N      | 0.2  | Not up to date | Cold   | Infectious     | Gastroenteritis       | Parvovirus           | N                     | Discharge               | 1                          | Discharge     |
| 13  | Mixed Breed | M      | N      | 0.3  | Not up to date | Cold   | Infectious     | Gastroenteritis       | Parvovirus           | N                     | Discharge               | 1                          | Discharge     |
| 14  | Breed       | F      | Y      | 5.0  | Up to date     | Cold   | Infectious     | Leptospirosis         | Leptospirosis        | N                     | Discharge               | 1                          | Discharge     |
| 15  | Mixed Breed | M      | N      |      | Not up to date | Cold   | Suspect        | Gastroenteritis       |                      | N                     | Discharge               | 1                          |               |
| 16  | Breed       | F      | Y      | 9.0  | Up to date     | Cold   | Infectious     | Dermatitis            | Dermatophytosis      | Y                     | Dead                    | 1                          | Dead          |
| 17  | Mixed Breed | M      | N      | 8.0  |                | Cold   | Infectious     | Dermatitis            | Sarcoptic Scabies    | Y                     | Dead                    | 1                          | Dead          |
| 18  | Breed       | F      | N      | 3.0  | Up to date     | Cold   | Suspect        | Distemper             |                      | Y                     | Dead                    | 1                          |               |
| 19  | Breed       | F      | Y      | 10.0 | Up to date     | Cold   | Not Infectious | Leptospirosis         |                      | Y                     | Discharge               | 1                          |               |
| 20  | Mixed Breed | F      | N      | 0.7  | Not up to date | Cold   | Suspect        | Gastroenteritis       |                      | N                     | Discharge               | 1                          |               |
| 21  | Breed       | M      | N      | 7.0  |                | Cold   | Infectious     | MDR                   | MDR                  | Y                     | Discharge               | 1                          | Discharge     |
| 22  | Mixed Breed | F      | N      | 1.0  |                | Cold   | Suspect        | Leptospirosis         |                      | Y                     | Discharge               | 1                          |               |
| 23  | Mixed Breed | M      | N      | 3.0  |                | Cold   | Suspect        | Leptospirosis         |                      | N                     | Discharge               | 1                          |               |
| 24  | Breed       | F      | N      | 12.0 | Up to date     | Cold   | Suspect        | Leptospirosis         |                      | Y                     | Discharge               | 1                          |               |
| 25  | Mixed Breed | F      | N      | 0.6  | Not up to date | Warm   | Infectious     | Distemper             | Distemper            | Y                     | Discharge               | 1                          | Discharge     |
| 26  | Breed       | M      | N      | 9.0  |                | Warm   | Infectious     | Leptospirosis         | Leptospirosis        | N                     | Dead                    | 1                          | Dead          |
| 27  | Mixed Breed | F      | N      | 0.3  | Not up to date | Warm   | Infectious     | Gastroenteritis       | Parvovirus           | N                     | Dead                    | 1                          | Dead          |
| 28  | Breed       | M      | N      | 15.0 | Not up to date | Warm   | Not Infectious | Leptospirosis         |                      | Y                     | Dead                    | 1                          |               |
| 29  | Breed       | M      | N      | 0.2  | Not up to date | Warm   | Suspect        | Gastroenteritis       |                      | Y                     | Dead                    | 1                          |               |
| 30  | Mixed Breed | M      | N      | 0.2  | Not up to date | Warm   | Suspect        | Distemper             |                      | Y                     | Dead                    | 1                          |               |
| 31  | Breed       | M      | N      | 4.0  |                | Warm   | Not Infectious | Leptospirosis         |                      | Y                     | Dead                    | 1                          |               |
| 32  | Breed       | F      | Y      | 3.0  |                | Warm   | Suspect        | Gastroenteritis       |                      | N                     | Discharge               | 1                          |               |
| 33  | Mixed Breed | F      | N      | 12.0 | Not up to date | Warm   | Suspect        | Leptospirosis         |                      | N                     | Dead                    | 1                          |               |
| 34  | Mixed Breed | M      | N      | 0.5  | Not up to date | Warm   | Suspect        | Gastroenteritis       |                      | N                     | Dead                    | 1                          |               |
| 35  | Breed       | F      | N      | 0.3  |                | Warm   | Suspect        | Gastroenteritis       |                      | N                     | Dead                    | 1                          |               |
| 36  | Breed       | F      | N      | 0.3  | Not up to date | Warm   | Infectious     | Gastroenteritis       | Parvovirus           | N                     | Discharge               | 1                          | Discharge     |
| 37  | Mixed Breed | F      | N      | 0.6  | Not up to date | Warm   | Suspect        | Gastroenteritis       |                      | N                     | Discharge               | 1                          |               |
| 38  | Mixed Breed | F      | N      | 2.0  | Not up to date | Warm   | Suspect        | Gastroenteritis       |                      | N                     | Discharge               | 1                          |               |
| 39  | Breed       | M      | N      | 0.8  | Up to date     | Warm   | Suspect        | Leptospirosis         |                      | N                     | Discharge               | 1                          |               |
| 40  | Breed       | F      | N      | 0.3  | Not up to date | Warm   | Suspect        | Gastroenteritis       |                      | N                     | Discharge               | 1                          |               |
| 41  | Breed       | M      | N      | 0.2  | Not up to date | Warm   | Suspect        | Gastroenteritis       |                      | N                     | Discharge               | 1                          |               |
| 42  | Mixed Breed | F      | N      | 4.0  | Not up to date | Warm   | Suspect        | Leptospirosis         |                      | N                     | Discharge               | 1                          |               |
| 43  | Mixed Breed | M      | N      | 1.0  |                | Warm   | Suspect        | Gastroenteritis       |                      | N                     | Discharge               | 1                          |               |
| 44  | Mixed Breed | F      | N      | 0.7  | Not up to date | Warm   | Infectious     | Gastroenteritis       | Parvovirus           | Y                     | Discharge               | 1                          | Discharge     |
| 45  | Breed       | M      | N      | 8.0  | Not up to date | Cold   | Infectious     | Leptospirosis         | Leptospirosis        | N                     | Dead                    | 1                          | Dead          |
| 46  | Mixed Breed | M      | N      | 0.3  | Not up to date | Warm   | Infectious     | Gastroenteritis       | Parvovirus           | N                     | Discharge               | 1                          | Discharge     |
| 47  | Mixed Breed | M      | N      | 0.7  | Not up to date | Warm   | Infectious     | Gastroenteritis       | Parvovirus           | Y                     | Discharge               | 1                          | Discharge     |
| 48  | Mixed Breed | F      | N      | 0.7  | Not up to date | Warm   | Infectious     | Gastroenteritis       | Parvovirus           | N                     | Discharge               | 1                          | Discharge     |
| 49  | Breed       | M      | N      | 0.1  | Not up to date | Warm   | Infectious     | Gastroenteritis       | Parvovirus           | Y                     | Dead                    | 1                          | Dead          |
| 50  | Mixed Breed | M      | Y      | 0.5  |                | Cold   | Suspect        | Leptospirosis         |                      | N                     | Dead                    | 1                          |               |
| 51  | Breed       | F      | N      | 0.5  | Not up to date | Cold   | Suspect        | Gastroenteritis       |                      | N                     | Discharge               | 1                          |               |
| 52  | Breed       | F      | N      | 0.5  | Not up to date | Cold   | Suspect        | Gastroenteritis       |                      | N                     | Discharge               | 1                          |               |
| 53  | Breed       | M      | N      | 3.0  | Up to date     | Cold   | Infectious     | Leptospirosis         | Leptospirosis        | Y                     | Discharge               | 1                          | Discharge     |
| 54  | Breed       | M      | N      | 0.3  | Not up to date | Cold   | Infectious     | Distemper             | Distemper            | N                     | Discharge               | 3                          | Discharge     |
| 55  | Breed       | M      | N      | 8.0  | Up to date     | Cold   | Suspect        | Leptospirosis         |                      | Y                     | Dead                    | 1                          |               |
| 56  | Mixed Breed | F      | Y      | 10.0 | Up to date     | Cold   | Not Infectious | Leptospirosis         |                      | Y                     | Discharge               | 1                          |               |
| 57  | Breed       | M      | N      | 6.0  | Up to date     | Cold   | Infectious     | MDR                   | MDR                  | Y                     | Dead                    | 1                          | Dead          |
| 58  | Mixed Breed | F      | N      | 8.0  | Up to date     | Cold   | Infectious     | Leptospirosis         | Leptospirosis        | Y                     | Discharge               | 1                          | Discharge     |
| 59  | Mixed Breed | M      | N      | 0.3  | Not up to date | Cold   | Suspect        | Gastroenteritis       |                      | N                     | Dead                    | 1                          |               |
| 60  | Mixed Breed | F      | N      | 8.0  | Not up to date | Cold   | Infectious     | Leptospirosis         | Leptospirosis        | N                     | Discharge               | 1                          | Dead          |
| 61  | Mixed Breed | F      | N      | 3.0  | Not up to date | Cold   | Infectious     | Leptospirosis         | Leptospirosis        | N                     | Discharge               | 1                          | Discharge     |
| 62  | Breed       | M      | N      | 12.0 | Up to date     | Cold   | Suspect        | Leptospirosis         |                      | N                     | Dead                    | 1                          |               |
| 63  | Breed       | M      | N      | 6.0  | Up to date     | Cold   | Infectious     | Leptospirosis         | Leptospirosis        | Y                     | Dead                    | 1                          | Dead          |
| 64  | Breed       | F      | N      | 11.0 |                | Cold   | Not Infectious | Leptospirosis         |                      | Y                     | Dead                    | 1                          |               |
| 65  | Mixed Breed | M      | N      | 0.5  | Not up to date | Cold   | Infectious     | Gastroenteritis       | Parvovirus           | N                     | Discharge               | 1                          | Discharge     |
| 66  | Mixed Breed | M      | N      | 0.3  |                | Cold   | Suspect        | Gastroenteritis       |                      | N                     | Dead                    | 1                          |               |
| 67  | Breed       | M      | N      | 9.0  | Up to date     | Cold   | Infectious     | MDR                   | MDR                  | Y                     | Discharge               | 1                          | Discharge     |
| 68  | Mixed Breed | F      | N      | 1.0  | Not up to date | Cold   | Suspect        | Gastroenteritis       |                      | N                     | Discharge               | 1                          |               |
| 69  | Breed       | F      | N      | 1.0  | Not up to date | Warm   | Suspect        | Dermatitis            |                      | N                     | Discharge               | 1                          | Discharge     |
| 70  | Breed       | F      | N      | 0.4  | Up to date     | Warm   | Infectious     | MDR                   | MDR                  | N                     | Discharge               | 1                          | Discharge     |
| 71  | Breed       | M      | N      | 1.0  | Not up to date | Warm   | Infectious     | Gastroenteritis       | Parvovirus           | N                     | Discharge               | 1                          | Discharge     |
| 72  | Mixed Breed | F      | N      | 0.3  | Not up to date | Warm   | Infectious     | Gastroenteritis       | Parvovirus           | N                     | Discharge               | 1                          | Discharge     |
| 73  | Mixed Breed | M      | N      | 0.3  | Not up to date | Warm   | Infectious     | Gastroenteritis       | Parvovirus           | Y                     | Discharge               | 1                          | Discharge     |
| 74  | Mixed Breed | M      | N      | 5.0  |                | Warm   | Infectious     | Distemper             | Distemper            | Y                     | Dead                    | 1                          | Dead          |
| 75  | Mixed Breed | M      | N      | 0.2  | Not up to date | Warm   | Infectious     | Gastroenteritis       | Parvovirus           | N                     | Discharge               | 1                          | Discharge     |
| 76  | Mixed Breed | F      | N      | 0.2  | Not up to date | Warm   | Infectious     | Gastroenteritis       | Parvovirus           | N                     | Discharge               | 1                          | Discharge     |
| 77  | Mixed Breed | M      | N      | 0.2  | Not up to date | Warm   | Infectious     | Gastroenteritis       | Parvovirus           | N                     | Discharge               | 1                          | Discharge     |
| 78  | Mixed Breed | M      | N      | 0.4  | Not up to date | Warm   | Infectious     | Gastroenteritis       | Parvovirus           | Y                     | Discharge               | 1                          | Discharge     |
| 79  | Breed       | F      | N      | 1.0  | Not up to date | Warm   | Infectious     | Gastroenteritis       | Parvovirus           | N                     | Discharge               | 1                          | Discharge     |
| 80  | Breed       | M      | N      | 1.0  | Not up to date | Warm   | Infectious     | Gastroenteritis       | Parvovirus           | Y                     | Discharge               | 1                          | Discharge     |
| 81  | Mixed Breed | F      | N      | 0.3  | Not up to date | Warm   | Suspect        | Gastroenteritis       |                      | N                     | Discharge               | 1                          |               |
| 82  | Mixed Breed | M      | N      | 0.3  |                | Warm   | Suspect        | Gastroenteritis       |                      | N                     | Discharge               | 1                          |               |
| 83  | Mixed Breed | F      | N      | 2.0  |                | Warm   | Infectious     | Gastroenteritis       | Parvovirus           | N                     | Discharge               | 1                          | Discharge     |
| 84  | Mixed Breed | F      | N      | 0.3  |                | Warm   | Infectious     | Gastroenteritis       | Parvovirus           | N                     | Discharge               | 1                          | Discharge     |
| 85  | Mixed Breed | M      | N      | 1.0  |                | Warm   | Infectious     | Gastroenteritis       | Parvovirus           | N                     | Discharge               | 1                          | Discharge     |
| 86  | Mixed Breed | F      | N      | 1.0  |                | Warm   | Infectious     | Gastroenteritis       | Parvovirus           | N                     | Discharge               | 1                          | Discharge     |
| 87  | Mixed Breed | M      | N      | 0.5  | Not up to date | Warm   | Infectious     | Gastroenteritis       | Parvovirus           | Y                     | Discharge               | 1                          | Discharge     |
| 88  | Mixed Breed | M      | N      | 6.0  | Not up to date | Warm   | Suspect        | Leptospirosis         |                      | N                     | Dead                    | 1                          |               |
| 89  | Mixed Breed | F      | Y      | 0.5  |                | Warm   | Infectious     | Leptospirosis         | Leptospirosis        | N                     | Discharge               | 1                          | Discharge     |
| 90  | Mixed Breed | M      | N      | 5.0  | Not up to date | Warm   | Infectious     | Gastroenteritis       | Parvovirus           | N                     | Discharge               | 1                          | Discharge     |
| 91  | Breed       | M      | N      | 0.8  | Not up to date | Warm   | Infectious     | Gastroenteritis       | Parvovirus           | Y                     | Discharge               | 1                          | Discharge     |
| 92  | Mixed Breed | F      | N      | 0.4  |                | Warm   | Infectious     | Gastroenteritis       | Parvovirus           | N                     | Discharge               | 1                          | Discharge     |
| 93  | Breed       | F      | N      | 6.0  | Not up to date | Warm   | Infectious     | Distemper             | Distemper            | N                     | Discharge               | 1                          | Discharge     |
| 94  | Breed       | M      | N      | 9.0  |                | Warm   | Infectious     | Distemper             | Distemper            | N                     | Dead                    | 1                          | Dead          |
| 95  | Mixed Breed | M      | N      | 1.0  | Not up to date | Cold   | Infectious     | Gastroenteritis       | Parvovirus           | N                     | Dead                    | 1                          | Dead          |
| 96  | Breed       | F      | N      | 0.8  | Up to date     | Cold   | Infectious     | Dermatitis            | Dermatophytosis      | Y                     | Discharge               | 1                          | Discharge     |
| 97  | Mixed Breed | M      | N      | 9.0  | Not up to date | Cold   | Infectious     | Leptospirosis         | Leptospirosis        | Y                     | Dead                    | 1                          | Dead          |
| 98  | Mixed Breed | M      | N      | 0.2  | Not up to date | Cold   | Suspect        | Gastroenteritis       |                      | N                     | Discharge               | 1                          |               |
| 99  | Breed       | F      | N      | 8.0  | Not up to date | Cold   | Not Infectious | Leptospirosis         |                      | Y                     | Discharge               | 1                          |               |
| 100 | Mixed Breed | M      | N      | 0.3  | Not up to date | Cold   | Suspect        | Gastroenteritis       |                      | Y                     | Discharge               | 1                          |               |
| 101 | Mixed Breed | F      | N      | 0.6  |                | Cold   | Suspect        | Gastroenteritis       |                      | N                     | Discharge               | 1                          |               |
| 102 | Breed       | F      | N      | 3.0  | Not up to date | Cold   | Suspect        | Leptospirosis         |                      | N                     | Dead                    | 1                          |               |
| 103 | Mixed Breed | M      | N      | 14.0 | Not up to date | Cold   | Suspect        | Others                |                      | Y                     | Discharge               | 1                          | Discharge     |
| 104 | Breed       | M      | N      | 0.3  | Up to date     | Cold   | Suspect        | Distemper             |                      | N                     | Discharge               | 1                          |               |
| 105 | Breed       | F      | N      | 3.0  | Not up to date | Cold   | Infectious     | Leptospirosis         | Leptospirosis        | Y                     | Dead                    | 1                          | Dead          |
| 106 | Mixed Breed | F      | N      | 0.3  |                | Cold   | Infectious     | Gastroenteritis       | Parvovirus           | N                     | Dead                    | 1                          | Dead          |
| 107 | Breed       | F      | N      | 0.4  | Not up to date | Cold   | Infectious     | Distemper             | Distemper            | Y                     | Discharge               | 3                          | Dead          |
| 108 | Breed       | M      | Y      | 2.0  | Not up to date | Cold   | Suspect        | Gastroenteritis       |                      | N                     | Discharge               | 1                          |               |
| 109 | Mixed Breed | F      | N      | 2.0  |                | Cold   | Suspect        | Gastroenteritis       |                      | N                     | Discharge               | 1                          |               |
| 110 | Mixed Breed | M      | N      | 2.0  |                | Cold   | Infectious     | Distemper             | Distemper            | N                     | Discharge               | 2                          | Dead          |

|     |             |   |   |      |                |      |                |                 |                              |   |  |           |             |
|-----|-------------|---|---|------|----------------|------|----------------|-----------------|------------------------------|---|--|-----------|-------------|
| 111 | Breed       | M | N | 1.0  | Up to date     | Cold | Not Infectious | Leptospirosis   |                              | N |  | Discharge | 1           |
| 112 | Mixed Breed | M | N | 5.0  |                | Cold | Infectious     | Respiratory     | Aspergillus rhinitis         | N |  | Discharge | 1 Discharge |
| 113 | Breed       | M | N | 8.0  |                | Cold | Infectious     | Respiratory     | Infectious Tracheobronchitis | Y |  | Dead      | 1 Dead      |
| 114 | Mixed Breed | M | N | 1.0  |                | Cold | Infectious     | Distemper       | Distemper                    | N |  | Dead      | 1 Dead      |
| 115 | Breed       | M | Y | 0.9  | Up to date     | Cold | Suspect        | Gastroenteritis |                              | N |  | Discharge | 1           |
| 116 | Breed       | M | Y | 8.0  | Not up to date | Cold | Infectious     | MDR             | MDR                          | Y |  | Discharge | 2 Dead      |
| 117 | Breed       | F | N | 7.0  | Up to date     | Cold | Infectious     | MDR             | MDR                          | Y |  | Discharge | 1 Discharge |
| 118 | Mixed Breed | F | N | 0.2  | Not up to date | Cold | Infectious     | Distemper       | Distemper                    | N |  | Dead      | 1 Dead      |
| 119 | Breed       | F | N | 9.0  | Up to date     | Cold | Infectious     | Leptospirosis   | Leptospirosis                | N |  | Discharge | 1 Discharge |
| 120 | Mixed Breed | M | N | 2.0  |                | Cold | Infectious     | Distemper       | Distemper                    | Y |  | Dead      | 1 Dead      |
| 121 | Breed       | F | Y | 8.0  | Not up to date | Cold | Infectious     | Dermatitis      | Dermatophytosis              | Y |  | Discharge | 1 Discharge |
| 122 | Breed       | M | N | 2.0  | Not up to date | Cold | Suspect        | Distemper       |                              | N |  | Discharge | 1 Discharge |
| 123 | Mixed Breed | M | N | 0.2  | Not up to date | Cold | Suspect        | Gastroenteritis |                              | N |  | Discharge | 1           |
| 124 | Mixed Breed | M | N | 1.0  | Not up to date | Cold | Infectious     | Leptospirosis   | Leptospirosis                | Y |  | Discharge | 1 Discharge |
| 125 | Mixed Breed | F | Y | 5.0  | Up to date     | Cold | Infectious     | Leptospirosis   | Leptospirosis                | N |  | Discharge | 1 Discharge |
| 126 | Breed       | M | N | 3.0  | Not up to date | Cold | Not Infectious | Distemper       |                              | Y |  | Discharge | 1           |
| 127 | Mixed Breed | F | Y | 0.8  | Up to date     | Cold | Not Infectious | Distemper       |                              | Y |  | Discharge | 1           |
| 128 | Breed       | M | N | 9.0  | Not up to date | Cold | Suspect        | Gastroenteritis |                              | Y |  | Discharge | 1           |
| 129 | Mixed Breed | M | N | 5.0  | Not up to date | Cold | Infectious     | Distemper       | Distemper                    | N |  | Dead      | 1 Dead      |
| 130 | Mixed Breed | M | Y | 2.0  |                | Cold | Suspect        | Distemper       |                              | N |  | Discharge | 1           |
| 131 | Mixed Breed | F | N | 1.0  | Not up to date | Cold | Infectious     | Distemper       | Distemper                    | N |  | Discharge | 2 Discharge |
| 132 | Breed       | M | N | 3.0  | Up to date     | Cold | Not Infectious | Leptospirosis   |                              | Y |  | Discharge | 1           |
| 133 | Mixed Breed | F | N | 5.0  | Not up to date | Warm | Not Infectious | Leptospirosis   |                              | Y |  | Dead      | 1           |
| 134 | Breed       | M | N | 0.8  | Up to date     | Warm | Infectious     | Distemper       | Distemper                    | N |  | Discharge | 1 Discharge |
| 135 | Mixed Breed | M | N | 7.0  | Not up to date | Warm | Infectious     | Leptospirosis   | Leptospirosis                | Y |  | Dead      | 1 Dead      |
| 136 | Mixed Breed | F | N | 0.3  | Not up to date | Warm | Infectious     | Others          | Adenovirus                   | N |  | Discharge | 1 Discharge |
| 137 | Breed       | M | N | 0.3  | Not up to date | Warm | Infectious     | Gastroenteritis | Parvovirus                   | N |  | Discharge | 1 Discharge |
| 138 | Breed       | M | N | 0.2  | Not up to date | Warm | Infectious     | Gastroenteritis | Parvovirus                   | N |  | Discharge | 1 Discharge |
| 139 | Mixed Breed | M | N | 0.3  | Not up to date | Warm | Infectious     | Distemper       | Distemper                    | N |  | Discharge | 1 Discharge |
| 140 | Breed       | M | N | 2.0  | Up to date     | Warm | Suspect        | Dermatitis      |                              | N |  | Discharge | 1           |
| 141 | Mixed Breed | M | N | 13.0 |                | Warm | Not Infectious | Leptospirosis   |                              | N |  | Dead      | 1           |
| 142 | Mixed Breed | M | N | 11.0 | Up to date     | Warm | Suspect        | Leptospirosis   |                              | N |  | Dead      | 1           |
| 143 | Mixed Breed | M | N | 3.0  | Not up to date | Warm | Infectious     | Distemper       | Distemper                    | N |  | Dead      | 1 Dead      |
| 144 | Breed       | M | N | 11.0 | Not up to date | Warm | Infectious     | MDR             | MDR                          | Y |  | Dead      | 1 Dead      |
| 145 | Breed       | M | N | 8.0  | Not up to date | Warm | Not Infectious | Leptospirosis   |                              | Y |  | Discharge | 1           |
| 146 | Breed       | M | N | 0.3  | Not up to date | Warm | Infectious     | Others          | Adenovirus                   | Y |  | Discharge | 1 Discharge |
| 147 | Breed       | M | N | 3.0  | Not up to date | Warm | Suspect        | Gastroenteritis |                              | N |  | Discharge | 1           |
| 148 | Mixed Breed | M | N | 12.0 |                | Warm | Suspect        | MDR             |                              | Y |  | Discharge | 1 Discharge |
| 149 | Breed       | F | N | 0.2  | Not up to date | Warm | Infectious     | Gastroenteritis | Parvovirus                   | N |  | Discharge | 1 Discharge |
| 150 | Mixed Breed | M | N | 2.0  |                | Warm | Infectious     | Respiratory     | Streptococcus Rhinitis       | Y |  | Discharge | 1 Discharge |
| 151 | Mixed Breed | M | N | 0.9  |                | Warm | Suspect        | Distemper       |                              | N |  | Discharge | 1           |
| 152 | Mixed Breed | F | N | 13.0 | Not up to date | Warm | Infectious     | Dermatitis      | Dermatophytosis              | Y |  | Dead      | 1 Dead      |
| 153 | Mixed Breed | F | N | 0.2  | Not up to date | Warm | Suspect        | Gastroenteritis |                              | N |  | Discharge | 1           |
| 154 | Breed       | M | N | 1.0  | Up to date     | Warm | Not Infectious | Leptospirosis   |                              | Y |  | Discharge | 1           |
| 155 | Breed       | F | N | 7.0  | Not up to date | Warm | Infectious     | Leptospirosis   | Leptospirosis                | N |  | Discharge | 1 Dead      |
| 156 | Mixed Breed | M | N | 1.0  | Not up to date | Warm | Suspect        | Gastroenteritis |                              | N |  | Discharge | 1           |
| 157 | Mixed Breed | M | N | 0.6  | Not up to date | Warm | Suspect        | Gastroenteritis |                              | N |  | Discharge | 1           |
| 158 | Breed       | M | N | 0.2  | Not up to date | Warm | Infectious     | Gastroenteritis | Parvovirus                   | N |  | Discharge | 1 Discharge |
| 159 | Breed       | M | N | 0.8  | Not up to date | Warm | Infectious     | Gastroenteritis | Parvovirus                   | N |  | Discharge | 1 Discharge |
| 160 | Breed       | F | N | 0.2  | Not up to date | Warm | Suspect        | Gastroenteritis |                              | N |  | Discharge | 1           |
| 161 | Mixed Breed | F | N | 15.0 | Not up to date | Warm | Not Infectious | Distemper       |                              | Y |  | Discharge | 1           |
| 162 | Mixed Breed | M | N | 0.6  | Not up to date | Warm | Infectious     | MDR             | MDR                          | N |  | Discharge | 1 Discharge |
| 163 | Breed       | M | N | 12.0 | Up to date     | Warm | Suspect        | Leptospirosis   |                              | Y |  | Discharge | 1           |
| 164 | Mixed Breed | F | N | 4.0  | Not up to date | Warm | Infectious     | Leptospirosis   | Leptospirosis                | N |  | Dead      | 1 Dead      |
| 165 | Breed       | M | N | 0.8  | Not up to date | Warm | Infectious     | Gastroenteritis | Parvovirus                   | N |  | Discharge | 1 Discharge |
| 166 | Breed       | F | Y | 12.0 |                | Warm | Suspect        | Leptospirosis   |                              | Y |  | Discharge | 1           |
| 167 | Mixed Breed | F | Y | 4.0  | Not up to date | Warm | Suspect        | Leptospirosis   |                              | Y |  | Discharge | 1           |
| 168 | Mixed Breed | F | N | 8.0  | Not up to date | Warm | Infectious     | Leptospirosis   | Leptospirosis                | Y |  | Dead      | 1 Dead      |
| 169 | Breed       | F | N | 0.4  | Up to date     | Warm | Infectious     | Others          | Adenovirus                   | N |  | Discharge | 1 Discharge |
| 170 | Breed       | F | N | 0.3  | Not up to date | Warm | Infectious     | Others          | Adenovirus                   | N |  | Discharge | 1 Discharge |
| 171 | Mixed Breed | M | N | 0.2  | Not up to date | Warm | Infectious     | Gastroenteritis | Parvovirus                   | N |  | Discharge | 1 Discharge |
| 172 | Breed       | M | N | 3.0  | Up to date     | Warm | Infectious     | MDR             | MDR                          | Y |  | Discharge | 1 Discharge |
| 173 | Breed       | F | N | 3.0  | Not up to date | Warm | Infectious     | Leptospirosis   | Leptospirosis                | N |  | Discharge | 1 Discharge |
| 174 | Mixed Breed | F | N | 0.2  | Not up to date | Warm | Infectious     | Gastroenteritis | Parvovirus                   | Y |  | Discharge | 1 Discharge |
| 175 | Mixed Breed | M | N | 12.0 | Not up to date | Warm | Not Infectious | Leptospirosis   |                              | Y |  | Discharge | 1           |
| 176 | Breed       | M | N | 0.2  | Not up to date | Warm | Infectious     | Gastroenteritis | Parvovirus                   | N |  | Discharge | 1 Discharge |
| 177 | Mixed Breed | M | N | 9.0  | Not up to date | Cold | Suspect        | Distemper       |                              | N |  | Discharge | 1           |
| 178 | Breed       | F | Y | 8.0  | Not up to date | Cold | Infectious     | Leptospirosis   | Leptospirosis                | N |  | Dead      | 1 Dead      |
| 179 | Breed       | M | N | 0.2  | Not up to date | Cold | Infectious     | Gastroenteritis | Parvovirus                   | Y |  | Discharge | 1 Discharge |
| 180 | Breed       | M | N | 0.2  | Not up to date | Cold | Infectious     | Gastroenteritis | Parvovirus                   | N |  | Dead      | 1 Dead      |
| 181 | Breed       | M | N | 5.0  | Up to date     | Cold | Not Infectious | Leptospirosis   |                              | Y |  | Dead      | 1           |
| 182 | Mixed Breed | M | N |      |                | Cold | Suspect        | Others          |                              | Y |  | Discharge | 1 Discharge |
| 183 | Breed       | M | N | 4.0  | Up to date     | Cold | Infectious     | Respiratory     | Infectious Tracheobronchitis | Y |  | Discharge | 1 Discharge |
| 184 | Breed       | F | N | 0.3  | Not up to date | Cold | Infectious     | Gastroenteritis | Parvovirus                   | N |  | Discharge | 1 Discharge |
| 185 | Breed       | M | N | 0.3  | Not up to date | Cold | Infectious     | Gastroenteritis | Parvovirus                   | N |  | Discharge | 1 Discharge |
| 186 | Mixed Breed | F | N | 4.0  | Not up to date | Cold | Infectious     | Leptospirosis   | Leptospirosis                | N |  | Dead      | 1 Dead      |
| 187 | Breed       | F | N | 6.0  | Not up to date | Cold | Infectious     | Leptospirosis   | Leptospirosis                | Y |  | Discharge | 1 Discharge |
| 188 | Breed       | M | N | 0.3  | Not up to date | Cold | Infectious     | Distemper       | Distemper                    | N |  | Discharge | 1 Dead      |
| 189 | Breed       | F | N | 4.0  | Up to date     | Cold | Infectious     | Distemper       | Distemper                    | Y |  | Dead      | 1 Dead      |
| 190 | Breed       | F | N | 1.0  | Not up to date | Cold | Infectious     | Leptospirosis   | Leptospirosis                | N |  | Discharge | 1 Discharge |
| 191 | Mixed Breed | M | N | 0.9  | Not up to date | Cold | Infectious     | Distemper       | Distemper                    | Y |  | Discharge | 2 Dead      |
| 192 | Breed       | M | N | 0.3  | Not up to date | Cold | Suspect        | Distemper       |                              | N |  | Discharge | 1           |
| 193 | Breed       | M | N | 0.3  | Not up to date | Cold | Infectious     | Distemper       | Distemper                    | N |  | Dead      | 1 Dead      |
| 194 | Breed       | M | N | 1.0  | Not up to date | Cold | Infectious     | Leptospirosis   | Leptospirosis                | N |  | Discharge | 1 Discharge |
| 195 | Breed       | F | Y | 12.0 | Not up to date | Cold | Not Infectious | Leptospirosis   |                              | Y |  | Discharge | 1           |
| 196 | Breed       | F | N | 5.0  | Up to date     | Cold | Not Infectious | Leptospirosis   |                              | Y |  | Discharge | 1           |
| 197 | Breed       | M | N | 0.7  |                | Cold | Infectious     | Respiratory     | Infectious Tracheobronchitis | N |  | Discharge | 1 Discharge |
| 198 | Breed       | F | N | 3.0  | Up to date     | Cold | Infectious     | Leptospirosis   | Leptospirosis                | N |  | Discharge | 1 Discharge |
| 199 | Mixed Breed | F | N |      |                | Cold | Suspect        | Distemper       |                              | N |  | Discharge | 1           |
| 200 | Breed       | F | N | 0.3  |                | Cold | Infectious     | Gastroenteritis | Parvovirus                   | N |  | Discharge | 1 Discharge |
| 201 | Mixed Breed | F | Y | 9.0  | Not up to date | Cold | Not Infectious | Leptospirosis   |                              | Y |  | Discharge | 1           |
| 202 | Breed       | M | N | 0.2  | Not up to date | Cold | Infectious     | Gastroenteritis | Parvovirus                   | N |  | Discharge | 1 Discharge |
| 203 | Breed       | M | N | 8.0  | Up to date     | Cold | Not Infectious | Leptospirosis   |                              | N |  | Discharge | 1           |
| 204 | Mixed Breed | M | N | 10.0 | Not up to date | Cold | Not Infectious | Distemper       |                              | Y |  | Discharge | 1           |
| 205 | Mixed Breed | F | Y | 8.0  | Not up to date | Cold | Not Infectious | Leptospirosis   |                              | Y |  | Discharge | 1           |
| 206 | Breed       | F | N | 0.8  | Up to date     | Cold | Suspect        | Leptospirosis   |                              | N |  | Discharge | 1           |
| 207 | Breed       | M | N | 15.0 |                | Cold | Infectious     | Distemper       | Distemper                    | Y |  | Dead      | 1 Dead      |
| 208 | Breed       | F | N | 0.3  | Not up to date | Cold | Infectious     | Gastroenteritis | Parvovirus                   | Y |  | Discharge | 1 Discharge |
| 209 | Breed       | M | Y | 12.0 | Up to date     | Cold | Infectious     | MDR             | MDR                          | Y |  | Discharge | 2 Discharge |
| 210 | Mixed Breed | M | N | 0.8  | Up to date     | Cold | Not Infectious | Distemper       |                              | N |  | Discharge | 1           |
| 211 | Mixed Breed | F | N | 2.0  | Not up to date | Cold | Suspect        | Others          |                              | Y |  | Discharge | 1 Discharge |
| 212 | Mixed Breed | F | N | 14.0 | Not up to date | Cold | Infectious     | MDR             | MDR                          | Y |  | Dead      | 1 Dead      |
| 213 | Breed       | M | N | 0.3  | Not up to date | Cold | Infectious     | Leptospirosis   | Leptospirosis                | N |  | Discharge | 1 Discharge |
| 214 | Breed       | M | N | 0.7  | Up to date     | Cold | Infectious     | Leptospirosis   | Leptospirosis                | N |  | Discharge | 1 Discharge |
| 215 | Breed       | M | N | 8.0  | Not up to date | Cold | Infectious     | Leptospirosis   | Leptospirosis                | N |  | Dead      | 1 Dead      |

|     |             |   |   |      |                |      |                |                 |                 |   |           |             |
|-----|-------------|---|---|------|----------------|------|----------------|-----------------|-----------------|---|-----------|-------------|
| 216 | Breed       | M | N | 12.0 | Not up to date | Cold | Not Infectious | Leptospirosis   |                 | Y | Discharge | 1           |
| 217 | Mixed Breed | M | N | 9.0  | Not up to date | Cold | Infectious     | Distemper       | Distemper       | N | Dead      | 1 Dead      |
| 218 | Mixed Breed | M | N | 4.0  | Not up to date | Cold | Infectious     | Gastroenteritis | Parvovirus      | N | Discharge | 1 Discharge |
| 219 | Mixed Breed | M | N | 14.0 | Not up to date | Cold | Suspect        | Leptospirosis   |                 | Y | Dead      | 1           |
| 220 | Mixed Breed | F | N | 5.0  | Up to date     | Cold | Not Infectious | Leptospirosis   |                 | Y | Discharge | 1           |
| 221 | Mixed Breed | M | N | 0.1  | Not up to date | Cold | Infectious     | Others          | Herpesvirus     | Y | Discharge | 1 Discharge |
| 222 | Breed       | M | N | 0.5  | Not up to date | Cold | Infectious     | Gastroenteritis | Parvovirus      | N | Discharge | 1 Discharge |
| 223 | Mixed Breed | M | N | 0.1  | Not up to date | Cold | Suspect        | Gastroenteritis |                 | N | Discharge | 1           |
| 224 | Mixed Breed | F | N | 0.3  | Not up to date | Cold | Suspect        | Distemper       |                 | Y | Discharge | 1           |
| 225 | Breed       | M | N | 5.0  | Not up to date | Cold | Infectious     | Leptospirosis   | Leptospirosis   | N | Discharge | 1 Discharge |
| 226 | Breed       | M | N | 2.0  | Not up to date | Cold | Not Infectious | Distemper       |                 | N | Discharge | 1           |
| 227 | Mixed Breed | M | N | 13.0 | Not up to date | Warm | Not Infectious | Leptospirosis   |                 | Y | Discharge | 1           |
| 228 | Breed       | M | N | 8.0  | Not up to date | Warm | Not Infectious | Leptospirosis   |                 | Y | Discharge | 1           |
| 229 | Mixed Breed | M | N | 0.9  | Not up to date | Warm | Infectious     | Leptospirosis   | Leptospirosis   | N | Discharge | 2 Discharge |
| 230 | Mixed Breed | F | Y | 12.0 | Up to date     | Warm | Infectious     | Dermatitis      | Dermatophytosis | Y | Discharge | 1 Discharge |
| 231 | Breed       | M | N | 14.0 | Not up to date | Warm | Not Infectious | Leptospirosis   |                 | Y | Discharge | 1           |
| 232 | Mixed Breed | F | N | 9.0  | Not up to date | Warm | Infectious     | Leptospirosis   | Leptospirosis   | N | Dead      | 1 Dead      |
| 233 | Mixed Breed | M | Y | 11.0 | Up to date     | Warm | Not Infectious | Leptospirosis   |                 | Y | Dead      | 1           |
| 234 | Mixed Breed | M | N | 4.0  | Up to date     | Warm | Infectious     | Leptospirosis   | Leptospirosis   | N | Discharge | 1 Discharge |
| 235 | Breed       | F | Y | 5.0  | Not up to date | Warm | Suspect        | Distemper       |                 | N | Dead      | 1 Dead      |
| 236 | Breed       | F | N | 0.2  | Not up to date | Warm | Infectious     | Gastroenteritis | Parvovirus      | N | Dead      | 1 Dead      |
| 237 | Breed       | F | N | 6.0  | Not up to date | Warm | Not Infectious | Leptospirosis   |                 | Y | Discharge | 1           |
| 238 | Mixed Breed | M | N | 0.2  | Not up to date | Warm | Infectious     | Gastroenteritis | Parvovirus      | N | Discharge | 1 Discharge |
| 239 | Breed       | M | N | 7.0  | Up to date     | Warm | Infectious     | Leptospirosis   | Leptospirosis   | Y | Discharge | 1 Discharge |
| 240 | Mixed Breed | M | N | 0.2  | Not up to date | Warm | Infectious     | Gastroenteritis | Parvovirus      | Y | Discharge | 1 Discharge |
| 241 | Breed       | M | N | 9.0  | Not up to date | Warm | Infectious     | Leptospirosis   | Leptospirosis   | Y | Dead      | 1 Dead      |
| 242 | Breed       | M | N | 10.0 | Not up to date | Warm | Not Infectious | Leptospirosis   |                 | Y | Discharge | 1           |
| 243 | Breed       | M | N | 0.4  | Not up to date | Warm | Infectious     | Distemper       | Distemper       | N | Dead      | 1 Dead      |
| 244 | Mixed Breed | F | Y | 4.0  | Not up to date | Warm | Not Infectious | Leptospirosis   |                 | Y | Discharge | 1           |
| 245 | Mixed Breed | M | N | 0.5  | Not up to date | Warm | Suspect        | Leptospirosis   |                 | N | Discharge | 1           |
| 246 | Mixed Breed | M | N | 0.2  | Not up to date | Warm | Infectious     | Gastroenteritis | Parvovirus      | N | Discharge | 1 Discharge |
| 247 | Breed       | F | N | 13.0 | Not up to date | Warm | Not Infectious | Leptospirosis   |                 | Y | Discharge | 1           |
| 248 | Mixed Breed | M | Y | 8.0  | Not up to date | Warm | Not Infectious | Leptospirosis   |                 | Y | Dead      | 1           |
| 249 | Mixed Breed | M | N | 10.0 | Not up to date | Warm | Suspect        | Gastroenteritis |                 | N | Discharge | 1           |
| 250 | Mixed Breed | M | N | 10.0 |                | Warm | Suspect        | Distemper       |                 | Y | Discharge | 1           |
| 251 | Breed       | M | N | 6.0  | Not up to date | Warm | Suspect        | Leptospirosis   |                 | N | Dead      | 1 Dead      |
| 252 | Mixed Breed | M | Y | 6.0  | Not up to date | Warm | Not Infectious | Distemper       |                 | Y | Discharge | 1           |
| 253 | Mixed Breed | F | N | 2.0  | Not up to date | Warm | Suspect        | Gastroenteritis |                 | N | Discharge | 1           |
| 254 | Mixed Breed | M | N | 0.2  | Not up to date | Warm | Suspect        | Gastroenteritis |                 | N | Discharge | 1           |
| 255 | Mixed Breed | M | N | 9.0  | Not up to date | Warm | Suspect        | Leptospirosis   |                 | N | Dead      | 1           |
| 256 | Mixed Breed | M | N | 0.3  | Not up to date | Warm | Infectious     | Gastroenteritis | Parvovirus      | Y | Discharge | 2 Dead      |
| 257 | Breed       | F | N | 0.2  | Not up to date | Warm | Infectious     | Gastroenteritis | Parvovirus      | N | Discharge | 1 Discharge |
| 258 | Breed       | M | N | 3.0  | Not up to date | Warm | Infectious     | Leptospirosis   | Leptospirosis   | N | Dead      | 1 Dead      |
| 259 | Mixed Breed | M | N | 14.0 | Not up to date | Warm | Suspect        | Distemper       |                 | N | Dead      | 1           |
| 260 | Mixed Breed | M | N | 10.0 | Not up to date | Warm | Not Infectious | Leptospirosis   |                 | N | Discharge | 1           |
| 261 | Breed       | F | Y | 6.0  | Not up to date | Warm | Suspect        | Leptospirosis   |                 | Y | Dead      | 1           |
| 262 | Breed       | M | N | 0.8  | Not up to date | Warm | Infectious     | Gastroenteritis | Parvovirus      | N | Dead      | 1 Dead      |
| 263 | Mixed Breed | M | N | 0.3  | Not up to date | Warm | Infectious     | Gastroenteritis | Parvovirus      | Y | Discharge | 1 Discharge |
| 264 | Breed       | M | N | 10.0 | Not up to date | Warm | Infectious     | MDR             | MDR             | Y | Discharge | 1 Discharge |
| 265 | Mixed Breed | M | N | 0.3  | Not up to date | Warm | Infectious     | Gastroenteritis | Parvovirus      | N | Discharge | 1 Discharge |
| 266 | Breed       | F | N | 0.2  | Not up to date | Warm | Infectious     | Gastroenteritis | Parvovirus      | N | Discharge | 1 Discharge |
| 267 | Mixed Breed | F | N | 0.5  | Not up to date | Warm | Infectious     | Gastroenteritis | Parvovirus      | N | Dead      | 1 Dead      |
| 268 | Mixed Breed | F | Y | 9.0  | Up to date     | Warm | Suspect        | Leptospirosis   |                 | Y | Discharge | 1 Discharge |
| 269 | Mixed Breed | M | N | 8.0  | Up to date     | Warm | Infectious     | Leptospirosis   | Leptospirosis   | Y | Discharge | 1 Discharge |
| 270 | Breed       | M | N | 7.0  |                | Warm | Infectious     | MDR             | MDR             | N | Discharge | 2 Discharge |
| 271 | Mixed Breed | F | N | 11.0 | Not up to date | Warm | Not Infectious | Leptospirosis   |                 | Y | Discharge | 1           |
| 272 | Breed       | F | N | 0.3  | Not up to date | Warm | Infectious     | Gastroenteritis | Parvovirus      | N | Discharge | 1 Discharge |
| 273 | Breed       | F | Y | 4.0  | Not up to date | Warm | Suspect        | Leptospirosis   |                 | N | Discharge | 1 Discharge |
| 274 | Breed       | M | N | 0.4  | Not up to date | Warm | Suspect        | Distemper       |                 | N | Discharge | 1           |
| 275 | Mixed Breed | F | Y | 9.0  | Not up to date | Warm | Not Infectious | Leptospirosis   |                 | Y | Discharge | 1           |
| 276 | Breed       | F | N | 0.3  | Not up to date | Cold | Infectious     | Gastroenteritis | Parvovirus      | N | Discharge | 1 Discharge |
| 277 | Breed       | F | N | 0.6  | Up to date     | Warm | Not Infectious | Distemper       |                 | N | Discharge | 1           |
| 278 | Breed       | M | N | 5.0  | Up to date     | Warm | Suspect        | Gastroenteritis |                 | Y | Discharge | 1           |
| 279 | Mixed Breed | F | Y | 13.0 | Up to date     | Warm | Suspect        | Others          |                 | N | Discharge | 1 Discharge |
| 280 | Breed       | F | Y | 11.0 | Not up to date | Warm | Infectious     | MDR             | MDR             | Y | Dead      | 1 Dead      |
| 281 | Breed       | F | N | 0.2  | Not up to date | Warm | Suspect        | Gastroenteritis |                 | N | Discharge | 1           |
| 282 | Breed       | M | N | 3.0  | Not up to date | Warm | Not Infectious | Leptospirosis   |                 | Y | Dead      | 1           |
| 283 | Breed       | M | N | 9.0  | Not up to date | Cold | Not Infectious | Leptospirosis   |                 | N | Discharge | 1           |
| 284 | Breed       | M | N | 2.0  | Up to date     | Cold | Suspect        | Others          |                 | Y | Discharge | 1 Discharge |
| 285 | Breed       | F | N | 0.4  |                | Cold | Infectious     | Gastroenteritis | Parvovirus      | Y | Discharge | 1 Discharge |
| 286 | Breed       | F | N | 0.4  |                | Cold | Infectious     | Gastroenteritis | Parvovirus      | Y | Discharge | 1 Discharge |
| 287 | Breed       | M | N | 0.2  | Not up to date | Cold | Infectious     | Gastroenteritis | Parvovirus      | N | Discharge | 1 Discharge |
| 288 | Breed       | M | N | 4.0  | Up to date     | Cold | Suspect        | Gastroenteritis |                 | Y | Discharge | 1           |
| 289 | Mixed Breed | M | N | 0.8  | Up to date     | Cold | Not Infectious | Distemper       |                 | Y | Discharge | 1           |
| 290 | Mixed Breed | M | N | 1.0  | Up to date     | Cold | Infectious     | Distemper       | Distemper       | Y | Discharge | 1 Discharge |
| 291 | Breed       | M | N | 0.2  | Not up to date | Cold | Infectious     | Gastroenteritis | Parvovirus      | N | Discharge | 1 Discharge |
| 292 | Breed       | M | N | 11.0 | Not up to date | Cold | Infectious     | Distemper       | Distemper       | Y | Dead      | 1           |
| 293 | Breed       | F | N | 11.0 | Not up to date | Cold | Infectious     | Dermatitis      | Dermatophytosis | Y | Discharge | 1 Discharge |
| 294 | Mixed Breed | F | Y | 10.0 | Not up to date | Cold | Suspect        | Gastroenteritis |                 | N | Discharge | 1           |
| 295 | Breed       | F | N | 7.0  | Up to date     | Cold | Suspect        | MDR             |                 | Y | Discharge | 1 Discharge |
| 296 | Breed       | M | N | 0.4  | Not up to date | Cold | Infectious     | Gastroenteritis | Parvovirus      | N | Dead      | 1 Dead      |
| 297 | Breed       | M | N | 0.3  | Not up to date | Cold | Suspect        | Gastroenteritis |                 | N | Discharge | 1 Discharge |
| 298 | Mixed Breed | F | N | 0.3  | Not up to date | Cold | Suspect        | Distemper       |                 | Y | Discharge | 1           |
| 299 | Breed       | M | N | 10.0 | Not up to date | Cold | Not Infectious | Leptospirosis   |                 | Y | Discharge | 1 Discharge |
| 300 | Breed       | M | N | 3.0  | Not up to date | Cold | Suspect        | Others          |                 | Y | Discharge | 1           |
| 301 | Breed       | F | N | 0.6  | Up to date     | Cold | Infectious     | Gastroenteritis | Parvovirus      | N | Discharge | 1 Discharge |
| 302 | Breed       | F | Y | 12.0 | Up to date     | Cold | Suspect        | Leptospirosis   |                 | N | Discharge | 1           |
| 303 | Mixed Breed | F | Y | 4.0  | Not up to date | Cold | Suspect        | Gastroenteritis |                 | N | Discharge | 1           |
| 304 | Mixed Breed | F | Y | 1.0  | Not up to date | Cold | Infectious     | Distemper       | Distemper       | Y | Discharge | 1 Discharge |
| 305 | Mixed Breed | M | N | 13.0 | Not up to date | Cold | Suspect        | Leptospirosis   |                 | Y | Discharge | 1           |
| 306 | Breed       | M | N | 11.0 | Not up to date | Cold | Not Infectious | Others          |                 | Y | Discharge | 1           |
| 307 | Breed       | F | Y | 9.0  | Not up to date | Cold | Suspect        | Gastroenteritis |                 | N | Dead      | 1           |
| 308 | Breed       | M | Y | 1.0  | Not up to date | Cold | Not Infectious | Distemper       |                 | N | Discharge | 1           |
| 309 | Breed       | F | Y | 9.0  | Not up to date | Cold | Suspect        | Leptospirosis   |                 | N | Discharge | 1           |
| 310 | Breed       | M | Y | 1.0  |                | Cold | Suspect        | Distemper       |                 | N | Discharge | 1           |
| 311 | Mixed Breed | F | N | 0.2  | Not up to date | Cold | Suspect        | Gastroenteritis |                 | Y | Discharge | 1           |
| 312 | Breed       | M | N | 10.0 | Not up to date | Cold | Not Infectious | Others          |                 | Y | Discharge | 1           |
| 313 | Breed       | M | Y | 14.0 | Not up to date | Cold | Infectious     | MDR             | MDR             | Y | Discharge | 1 Discharge |
| 314 | Mixed Breed | F | Y | 4.0  | Up to date     | Cold | Not Infectious | Leptospirosis   |                 | N | Discharge | 1           |
| 315 | Mixed Breed | M | N | 0.3  | Not up to date | Cold | Suspect        | Distemper       |                 | N | Discharge | 1 Discharge |
| 316 | Breed       | M | N | 7.0  | Up to date     | Cold | Infectious     | Leptospirosis   | Leptospirosis   | Y | Discharge | 1 Discharge |
| 317 | Breed       | M | N | 7.0  | Not up to date | Cold | Suspect        | Gastroenteritis |                 | N | Discharge | 1 Discharge |
| 318 | Breed       | M | N | 1.0  | Not up to date | Cold | Infectious     | Leptospirosis   | Leptospirosis   | N | Dead      | 1           |
| 319 | Breed       | F | N | 9.0  | Not up to date | Cold | Infectious     | Leptospirosis   | Leptospirosis   | N | Dead      | 1 Dead      |
| 320 | Mixed Breed | M | N | 14.0 | Not up to date | Warm | Infectious     | MDR             | MDR             | Y | Dead      | 1 Dead      |

|     |             |   |   |      |                |      |                |                 |                   |   |           |             |
|-----|-------------|---|---|------|----------------|------|----------------|-----------------|-------------------|---|-----------|-------------|
| 321 | Breed       | F | N | 6.0  | Not up to date | Warm | Not Infectious | Leptospirosis   |                   | N | Discharge | 1           |
| 322 | Mixed Breed | F | Y | 14.0 | Up to date     | Warm | Not Infectious | Leptospirosis   |                   | N | Discharge | 1           |
| 323 | Breed       | M | N | 7.0  | Not up to date | Warm | Suspect        | Gastroenteritis |                   | Y | Discharge | 1           |
| 324 | Breed       | M | N | 0.3  | Not up to date | Warm | Infectious     | Gastroenteritis | Parvovirus        | N | Discharge | 1 Discharge |
| 325 | Mixed Breed | F | Y | 11.0 | Not up to date | Warm | Suspect        | Gastroenteritis |                   | N | Discharge | 1           |
| 326 | Breed       | M | N | 4.0  | Up to date     | Warm | Infectious     | MDR             | MDR               | Y | Discharge | 1 Dead      |
| 327 | Breed       | F | Y | 9.0  |                | Warm | Suspect        | Leptospirosis   |                   | N | Discharge | 1           |
| 328 | Breed       | M | Y | 8.0  | Not up to date | Warm | Suspect        | Leptospirosis   |                   | N | Discharge | 1           |
| 329 | Mixed Breed | F | N | 0.3  | Not up to date | Warm | Infectious     | Gastroenteritis | Parvovirus        | N | Discharge | 1 Discharge |
| 330 | Breed       | F | N | 2.0  | Up to date     | Warm | Not Infectious | Leptospirosis   |                   | Y | Discharge | 1           |
| 331 | Breed       | F | N | 1.0  | Up to date     | Warm | Suspect        | Distemper       |                   | N | Discharge | 1 Discharge |
| 332 | Breed       | M | N | 0.1  | Not up to date | Warm | Infectious     | Gastroenteritis | Parvovirus        | N | Discharge | 1 Discharge |
| 333 | Breed       | F | N | 0.1  | Not up to date | Warm | Infectious     | Gastroenteritis | Parvovirus        | N | Discharge | 1 Discharge |
| 334 | Breed       | M | N | 0.1  | Not up to date | Warm | Infectious     | Gastroenteritis | Parvovirus        | N | Discharge | 1 Discharge |
| 335 | Breed       | M | N | 12.0 | Not up to date | Warm | Suspect        | Leptospirosis   |                   | Y | Dead      | 1           |
| 336 | Mixed Breed | F | Y | 2.0  | Up to date     | Warm | Not Infectious | Leptospirosis   |                   | Y | Discharge | 1           |
| 337 | Mixed Breed | F | N | 0.3  | Not up to date | Warm | Infectious     | Gastroenteritis | Parvovirus        | N | Dead      | 1 Dead      |
| 338 | Breed       | M | N | 9.0  | Not up to date | Warm | Not Infectious | Distemper       |                   | N | Discharge | 1           |
| 339 | Breed       | M | N | 6.0  |                | Warm | Suspect        | Others          |                   | N | Discharge | 1           |
| 340 | Breed       | M | Y | 15.0 | Not up to date | Warm | Infectious     | Leptospirosis   | Leptospirosis     | Y | Dead      | 1 Dead      |
| 341 | Mixed Breed | M | N | 17.0 |                | Warm | Suspect        | Others          |                   | Y | Discharge | 1           |
| 342 | Mixed Breed | F | N | 1.0  | Not up to date | Warm | Infectious     | Gastroenteritis | Parvovirus        | N | Discharge | 1 Discharge |
| 343 | Breed       | F | N | 12.0 | Not up to date | Warm | Not Infectious | Leptospirosis   |                   | Y | Discharge | 1           |
| 344 | Mixed Breed | F | N | 0.7  | Not up to date | Warm | Infectious     | Gastroenteritis | Parvovirus        | N | Discharge | 1 Discharge |
| 345 | Mixed Breed | M | N | 0.2  | Not up to date | Warm | Infectious     | Gastroenteritis | Parvovirus        | N | Discharge | 1 Discharge |
| 346 | Breed       | M | Y | 11.0 | Not up to date | Warm | Suspect        | Others          |                   | Y | Dead      | 1           |
| 347 | Breed       | M | N | 0.3  | Not up to date | Warm | Infectious     | Gastroenteritis | Parvovirus        | N | Dead      | 1 Dead      |
| 348 | Breed       | M | N | 0.9  | Not up to date | Warm | Infectious     | Gastroenteritis | Parvovirus        | N | Discharge | 1 Discharge |
| 349 | Breed       | F | Y | 5.0  | Not up to date | Warm | Not Infectious | Leptospirosis   |                   | N | Discharge | 1           |
| 350 | Breed       | M | N | 8.0  | Not up to date | Warm | Suspect        | Leptospirosis   |                   | Y | Dead      | 1           |
| 351 | Mixed Breed | F | N | 0.2  | Not up to date | Warm | Infectious     | Leptospirosis   | Leptospirosis     | N | Dead      | 1 Dead      |
| 352 | Breed       | M | N | 7.0  | Not up to date | Warm | Suspect        | Leptospirosis   |                   | Y | Discharge | 1           |
| 353 | Breed       | M | N | 5.0  | Not up to date | Warm | Infectious     | Leptospirosis   | Leptospirosis     | Y | Discharge | 1 Discharge |
| 354 | Breed       | M | N | 0.8  | Not up to date | Warm | Infectious     | Gastroenteritis | Parvovirus        | N | Discharge | 1 Discharge |
| 355 | Breed       | M | N | 10.0 | Not up to date | Warm | Suspect        | Leptospirosis   |                   | Y | Dead      | 1           |
| 356 | Mixed Breed | M | N | 0.2  | Not up to date | Warm | Infectious     | Gastroenteritis | Parvovirus        | N | Discharge | 1 Discharge |
| 357 | Mixed Breed | M | N | 0.3  | Not up to date | Warm | Infectious     | Gastroenteritis | Parvovirus        | N | Discharge | 1 Discharge |
| 358 | Mixed Breed | F | N | 14.0 | Not up to date | Warm | Infectious     | Gastroenteritis | Parvovirus        | Y | Discharge | 1 Discharge |
| 359 | Breed       | F | Y | 10.0 | Not up to date | Warm | Not Infectious | Leptospirosis   |                   | Y | Discharge | 1           |
| 360 | Breed       | F | N | 0.1  | Not up to date | Warm | Infectious     | Gastroenteritis | Parvovirus        | N | Discharge | 1 Discharge |
| 361 | Mixed Breed | M | N | 0.3  |                | Warm | Infectious     | Gastroenteritis | Parvovirus        | Y | Dead      | 1 Dead      |
| 362 | Breed       | F | N | 0.2  | Not up to date | Warm | Infectious     | Gastroenteritis | Parvovirus        | N | Discharge | 1 Discharge |
| 363 | Mixed Breed | M | N | 0.4  | Not up to date | Warm | Infectious     | Gastroenteritis | Parvovirus        | Y | Discharge | 1 Discharge |
| 364 | Mixed Breed | F | Y | 10.0 | Not up to date | Warm | Not Infectious | Leptospirosis   |                   | Y | Discharge | 1           |
| 365 | Mixed Breed | M | N | 8.0  | Not up to date | Warm | Suspect        | Others          |                   | N | Discharge | 1           |
| 366 | Breed       | F | N | 0.2  | Not up to date | Cold | Infectious     | Distemper       | Distemper         | Y | Discharge | 1 Discharge |
| 367 | Mixed Breed | M | Y | 3.0  | Not up to date | Cold | Infectious     | Leptospirosis   | Leptospirosis     | N | Dead      | 1 Dead      |
| 368 | Mixed Breed | F | N | 8.0  |                | Cold | Infectious     | Leptospirosis   | Leptospirosis     | N | Dead      | 1 Dead      |
| 369 | Breed       | F | N | 8.0  | Not up to date | Cold | Suspect        | MDR             |                   | Y | Discharge | 1           |
| 370 | Breed       | M | N | 11.0 | Up to date     | Cold | Not Infectious | Leptospirosis   |                   | Y | Discharge | 1           |
| 371 | Mixed Breed | M | N | 0.2  | Not up to date | Cold | Infectious     | Gastroenteritis | Parvovirus        | N | Discharge | 1 Discharge |
| 372 | Breed       | M | N | 4.0  | Not up to date | Cold | Not Infectious | Distemper       |                   | N | Discharge | 1           |
| 373 | Mixed Breed | F | Y | 0.8  | Not up to date | Cold | Infectious     | Gastroenteritis | Parvovirus        | Y | Discharge | 1 Discharge |
| 374 | Breed       | F | N | 6.0  | Not up to date | Cold | Infectious     | Leptospirosis   | Leptospirosis     | N | Dead      | 1 Dead      |
| 375 | Breed       | F | N | 0.2  | Not up to date | Cold | Infectious     | Gastroenteritis | Parvovirus        | N | Discharge | 1 Discharge |
| 376 | Breed       | F | N | 0.1  | Not up to date | Cold | Infectious     | Gastroenteritis | Parvovirus        | N | Discharge | 1 Discharge |
| 377 | Breed       | M | Y | 12.0 | Not up to date | Cold | Infectious     | Leptospirosis   | Leptospirosis     | Y | Discharge | 1 Discharge |
| 378 | Mixed Breed | M | Y | 13.0 | Not up to date | Cold | Suspect        | Leptospirosis   |                   | Y | Discharge | 1           |
| 379 | Mixed Breed | F | N | 3.0  | Not up to date | Cold | Suspect        | Leptospirosis   |                   | Y | Discharge | 1           |
| 380 | Breed       | M | N | 0.2  | Not up to date | Cold | Infectious     | Gastroenteritis | Parvovirus        | Y | Discharge | 2 Dead      |
| 381 | Mixed Breed | F | Y | 16.0 |                | Cold | Infectious     | MDR             | MDR               | Y | Dead      | 1 Dead      |
| 382 | Breed       | F | N | 0.2  | Not up to date | Cold | Infectious     | Gastroenteritis | Parvovirus        | Y | Discharge | 2 Discharge |
| 383 | Mixed Breed | M | N | 3.0  | Not up to date | Cold | Suspect        | Leptospirosis   |                   | Y | Discharge | 1           |
| 384 | Breed       | F | Y | 7.0  | Not up to date | Cold | Infectious     | Leptospirosis   | Leptospirosis     | Y | Discharge | 1 Discharge |
| 385 | Breed       | M | Y | 12.0 | Not up to date | Cold | Suspect        | Leptospirosis   |                   | Y | Discharge | 1           |
| 386 | Breed       | F | N | 1.0  | Not up to date | Cold | Suspect        | Leptospirosis   |                   | N | Discharge | 1           |
| 387 | Mixed Breed | M | N | 16.0 | Not up to date | Cold | Infectious     | Dermatitis      | Sarcoptic Scabies | Y | Discharge | 1 Discharge |
| 388 | Breed       | M | N | 6.0  | Up to date     | Cold | Infectious     | Leptospirosis   | Leptospirosis     | Y | Discharge | 1 Discharge |
| 389 | Breed       | M | N | 3.0  | Not up to date | Cold | Not Infectious | Leptospirosis   |                   | Y | Discharge | 1           |
| 390 | Mixed Breed | F | N | 7.0  | Not up to date | Cold | Not Infectious | Leptospirosis   |                   | Y | Discharge | 1           |
| 391 | Breed       | M | N | 0.2  | Not up to date | Cold | Infectious     | Gastroenteritis | Parvovirus        | N | Discharge | 1 Discharge |
| 392 | Breed       | F | N | 0.6  | Not up to date | Cold | Infectious     | Gastroenteritis | Parvovirus        | N | Discharge | 1 Discharge |
| 393 | Breed       | F | Y | 12.0 |                | Cold | Not Infectious | MDR             |                   | Y | Discharge | 1           |
| 394 | Breed       | M | N | 0.2  | Not up to date | Cold | Infectious     | Gastroenteritis | Parvovirus        | N | Dead      | 1 Dead      |
| 395 | Mixed Breed | F | N | 18.0 | Up to date     | Cold | Infectious     | Gastroenteritis | Cryptosporidium   | Y | Discharge | 1 Discharge |
| 396 | Mixed Breed | F | N | 0.2  | Not up to date | Cold | Infectious     | Gastroenteritis | Parvovirus        | Y | Discharge | 1 Discharge |
| 397 | Mixed Breed | F | N | 0.2  | Not up to date | Cold | Infectious     | Gastroenteritis | Parvovirus        | N | Discharge | 1 Discharge |
| 398 | Mixed Breed | F | Y | 3.0  | Up to date     | Cold | Infectious     | Leptospirosis   | Leptospirosis     | N | Dead      | 1 Dead      |
| 399 | Breed       | M | Y | 11.0 | Not up to date | Cold | Not Infectious | Leptospirosis   |                   | Y | Discharge | 1           |
| 400 | Breed       | F | Y | 6.0  | Not up to date | Cold | Infectious     | Leptospirosis   | Leptospirosis     | Y | Discharge | 1 Discharge |
| 401 | Mixed Breed | F | N | 8.0  | Up to date     | Cold | Suspect        | Leptospirosis   |                   | N | Discharge | 1           |
| 402 | Mixed Breed | M | Y | 6.0  | Not up to date | Cold | Not Infectious | Leptospirosis   |                   | Y | Dead      | 1           |
| 403 | Breed       | M | N | 8.0  | Not up to date | Cold | Not Infectious | Leptospirosis   |                   | Y | Dead      | 1           |
| 404 | Breed       | F | Y | 12.0 | Not up to date | Cold | Not Infectious | Leptospirosis   |                   | Y | Discharge | 1           |
| 405 | Mixed Breed | F | N | 4.0  | Not up to date | Cold | Suspect        | Others          |                   | Y | Discharge | 1           |
| 406 | Mixed Breed | M | N | 8.0  | Not up to date | Cold | Infectious     | Leptospirosis   | Leptospirosis     | N | Dead      | 1 Dead      |
| 407 | Breed       | M | Y | 13.0 | Up to date     | Cold | Infectious     | Dermatitis      | Dermatophytosis   | Y | Dead      | 1 Dead      |
| 408 | Mixed Breed | M | N | 8.0  | Not up to date | Cold | Infectious     | Leptospirosis   | Leptospirosis     | Y | Discharge | 1 Discharge |
| 409 | Mixed Breed | M | N | 0.2  | Not up to date | Warm | Suspect        | Gastroenteritis |                   | Y | Dead      | 1           |
| 410 | Breed       | M | N | 3.0  | Not up to date | Warm | Suspect        | Distemper       |                   | Y | Discharge | 1           |
| 411 | Breed       | F | Y | 10.0 | Not up to date | Warm | Not Infectious | Leptospirosis   |                   | Y | Discharge | 1           |
| 412 | Mixed Breed | F | N | 0.1  | Not up to date | Warm | Infectious     | Gastroenteritis | Parvovirus        | N | Dead      | 1 Dead      |
| 413 | Breed       | F | N | 7.0  | Not up to date | Warm | Infectious     | Leptospirosis   | Leptospirosis     | N | Dead      | 1 Dead      |
| 414 | Mixed Breed | M | N | 0.2  | Not up to date | Warm | Infectious     | Gastroenteritis | Parvovirus        | N | Discharge | 1 Discharge |
| 415 | Breed       | F | N | 6.0  | Not up to date | Warm | Suspect        | MDR             |                   | Y | Discharge | 1           |
| 416 | Breed       | M | N | 3.0  | Up to date     | Warm | Infectious     | Dermatitis      | Dermatophytosis   | Y | Discharge | 1 Discharge |
| 417 | Mixed Breed | M | Y | 15.0 |                | Warm | Suspect        | Gastroenteritis |                   | N | Discharge | 1 Discharge |
| 418 | Breed       | M | N | 0.2  | Not up to date | Warm | Infectious     | Gastroenteritis | Parvovirus        | Y | Dead      | 1 Dead      |
| 419 | Breed       | M | N | 7.0  | Not up to date | Warm | Suspect        | Leptospirosis   |                   | Y | Discharge | 1           |
| 420 | Mixed Breed | M | N | 4.0  | Not up to date | Warm | Not Infectious | Distemper       |                   | Y | Discharge | 1           |
| 421 | Breed       | F | Y | 12.0 | Up to date     | Warm | Infectious     | MDR             | MDR               | Y | Discharge | 1 Dead      |
| 422 | Breed       | F | Y | 7.0  | Not up to date | Warm | Not Infectious | Leptospirosis   |                   | Y | Discharge | 1           |
| 423 | Mixed Breed | M | N | 15.0 | Not up to date | Warm | Suspect        | Others          |                   | Y | Dead      | 1           |
| 424 | Breed       | F | Y | 3.0  | Not up to date | Warm | Not Infectious | Leptospirosis   |                   | Y | Discharge | 1           |
| 425 | Breed       | M | N | 4.0  | Not up to date | Warm | Infectious     | Leptospirosis   | Leptospirosis     | N | Dead      | 1 Dead      |

|     |             |   |   |      |                |      |                |                 |               |   |           |             |
|-----|-------------|---|---|------|----------------|------|----------------|-----------------|---------------|---|-----------|-------------|
| 426 | Mixed Breed | M | N | 5.0  | Not up to date | Warm | Suspect        | Leptospirosis   |               | Y | Discharge | 1           |
| 427 | Mixed Breed | M | Y | 14.0 | Not up to date | Warm | Suspect        | Leptospirosis   |               | Y | Discharge | 1           |
| 428 | Mixed Breed | M | N | 0.5  | Not up to date | Warm | Infectious     | Gastroenteritis |               | Y | Discharge | 1 Discharge |
| 429 | Mixed Breed | F | N | 0.2  | Not up to date | Warm | Infectious     | Gastroenteritis | Parvovirus    | N | Discharge | 1 Discharge |
| 430 | Mixed Breed | F | N | 7.0  | Not up to date | Warm | Suspect        | Leptospirosis   |               | Y | Discharge | 1           |
| 431 | Breed       | F | N | 2.0  | Up to date     | Warm | Infectious     | MDR             | MDR           | Y | Discharge | 1 Discharge |
| 432 | Breed       | M | N | 0.2  | Not up to date | Warm | Suspect        | Gastroenteritis |               | N | Discharge | 1           |
| 433 | Breed       | F | N | 11.0 | Not up to date | Warm | Not Infectious | Leptospirosis   |               | Y | Discharge | 1           |
| 434 | Breed       | M | N | 0.3  | Not up to date | Warm | Suspect        | Gastroenteritis |               | Y | Discharge | 1           |
| 435 | Breed       | M | N | 7.0  | Not up to date | Warm | Not Infectious | Leptospirosis   |               | Y | Discharge | 1           |
| 436 | Mixed Breed | M | N | 0.2  | Not up to date | Warm | Suspect        | Gastroenteritis |               | Y | Discharge | 1           |
| 437 | Mixed Breed | M | N | 12.0 | Not up to date | Warm | Suspect        | Others          |               | Y | Discharge | 1           |
| 438 | Breed       | M | N | 0.3  | Not up to date | Warm | Infectious     | Gastroenteritis | Parvovirus    | Y | Discharge | 1 Discharge |
| 439 | Breed       | M | N | 9.0  | Not up to date | Warm | Infectious     | MDR             | MDR           | Y | Discharge | 1 Discharge |
| 440 | Mixed Breed | M | N | 0.3  | Not up to date | Warm | Infectious     | Gastroenteritis | Parvovirus    | N | Discharge | 1 Discharge |
| 441 | Breed       | F | N | 0.3  | Not up to date | Warm | Infectious     | Gastroenteritis | Parvovirus    | Y | Discharge | 1 Discharge |
| 442 | Mixed Breed | F | Y | 1.0  | Not up to date | Warm | Suspect        | Others          |               | N | Discharge | 1           |
| 443 | Breed       | M | N | 9.0  | Not up to date | Warm | Suspect        | Leptospirosis   |               | Y | Dead      | 1           |
| 444 | Breed       | F | Y | 14.0 | Not up to date | Warm | Suspect        | Leptospirosis   |               | Y | Discharge | 1           |
| 445 | Mixed Breed | M | N | 14.0 | Up to date     | Warm | Not Infectious | Leptospirosis   |               | Y | Discharge | 1           |
| 446 | Mixed Breed | F | Y | 8.0  | Up to date     | Warm | Suspect        | Gastroenteritis |               | Y | Discharge | 1           |
| 447 | Mixed Breed | M | N | 0.3  | Not up to date | Warm | Infectious     | Gastroenteritis | Parvovirus    | Y | Discharge | 1 Discharge |
| 448 | Breed       | F | Y | 5.0  | Up to date     | Warm | Suspect        | Leptospirosis   |               | N | Discharge | 1           |
| 449 | Breed       | M | N | 13.0 | Not up to date | Warm | Suspect        | Others          |               | Y | Discharge | 1           |
| 450 | Breed       | M | N | 7.0  | Not up to date | Warm | Infectious     | Leptospirosis   | Leptospirosis | Y | Discharge | 1 Discharge |
| 451 | Breed       | F | Y | 14.0 | Not up to date | Warm | Not Infectious | Leptospirosis   |               | Y | Discharge | 1           |
| 452 | Mixed Breed | F | N | 1.0  | Not up to date | Warm | Suspect        | Leptospirosis   |               | Y | Discharge | 1           |
| 453 | Breed       | M | N | 0.2  | Not up to date | Cold | Infectious     | Gastroenteritis | Parvovirus    | N | Discharge | 1 Discharge |
| 454 | Mixed Breed | M | N | 3.0  | Not up to date | Cold | Suspect        | Gastroenteritis |               | N | Discharge | 1           |
| 455 | Mixed Breed | M | N | 16.0 | Not up to date | Cold | Suspect        | Others          |               | Y | Discharge | 1           |
| 456 | Mixed Breed | F | Y | 9.0  | Up to date     | Cold | Not Infectious | Leptospirosis   |               | Y | Discharge | 1           |
| 457 | Breed       | M | N | 4.0  | Not up to date | Cold | Suspect        | Others          |               | Y | Discharge | 1           |
| 458 | Mixed Breed | M | N | 7.0  | Not up to date | Cold | Suspect        | Others          |               | Y | Discharge | 1           |
| 459 | Mixed Breed | M | N | 1.0  | Not up to date | Cold | Suspect        | Leptospirosis   |               | Y | Discharge | 1           |
| 460 | Mixed Breed | M | Y | 11.0 | Not up to date | Cold | Suspect        | Leptospirosis   |               | Y | Dead      | 1           |
| 461 | Mixed Breed | M | Y | 10.0 | Up to date     | Cold | Infectious     | MDR             | MDR           | Y | Dead      | 1 Dead      |
| 462 | Breed       | F | N | 0.1  | Not up to date | Cold | Suspect        | Gastroenteritis |               | Y | Discharge | 1           |
| 463 | Breed       | M | N | 7.0  | Up to date     | Cold | Suspect        | Gastroenteritis |               | N | Discharge | 1           |
| 464 | Mixed Breed | F | Y | 12.0 | Up to date     | Cold | Not Infectious | Leptospirosis   |               | Y | Discharge | 1           |
| 465 | Breed       | M | N | 8.0  | Up to date     | Cold | Not Infectious | Leptospirosis   |               | Y | Discharge | 1           |
| 466 | Breed       | M | N | 10.0 | Not up to date | Cold | Suspect        | Others          |               | Y | Dead      | 1           |
| 467 | Breed       | F | Y | 8.0  | Not up to date | Cold | Suspect        | Leptospirosis   |               | Y | Dead      | 1           |
| 468 | Mixed Breed | M | N | 6.0  | Not up to date | Cold | Suspect        | Others          |               | Y | Discharge | 1           |
| 469 | Mixed Breed | M | N | 4.0  | Not up to date | Cold | Suspect        | Gastroenteritis |               | Y | Discharge | 1           |
| 470 | Mixed Breed | M | N | 0.3  | Not up to date | Cold | Infectious     | Gastroenteritis | Parvovirus    | Y | Discharge | 1 Discharge |
| 471 | Breed       | M | N | 0.3  | Not up to date | Cold | Infectious     | Gastroenteritis | Parvovirus    | N | Discharge | 1 Discharge |
| 472 | Breed       | M | N | 0.8  | Not up to date | Cold | Infectious     | Gastroenteritis | Parvovirus    | Y | Discharge | 1 Discharge |
| 473 | Mixed Breed | F | N | 0.3  | Not up to date | Cold | Suspect        | Others          |               | Y | Discharge | 1           |
| 474 | Breed       | F | N | 0.3  | Not up to date | Cold | Suspect        | Gastroenteritis |               | N | Discharge | 1           |
| 475 | Breed       | F | N | 10.0 | Not up to date | Cold | Infectious     | MDR             | MDR           | Y | Discharge | 3 Discharge |
| 476 | Mixed Breed | F | N | 14.0 | Not up to date | Cold | Infectious     | MDR             | MDR           | Y | Dead      | 1 Dead      |
| 477 | Breed       | F | Y | 8.0  | Not up to date | Cold | Infectious     | Leptospirosis   | Leptospirosis | N | Discharge | 1 Discharge |
| 478 | Breed       | M | N | 0.3  | Not up to date | Cold | Infectious     | Gastroenteritis | Parvovirus    | N | Discharge | 1 Discharge |
| 479 | Breed       | M | N | 4.0  | Up to date     | Cold | Not Infectious | Leptospirosis   |               | Y | Discharge | 1           |
| 480 | Breed       | F | Y | 14.0 | Not up to date | Cold | Suspect        | Others          |               | Y | Discharge | 1           |
| 481 | Mixed Breed | F | Y | 13.0 | Up to date     | Cold | Infectious     | Leptospirosis   | Leptospirosis | N | Dead      | 1 Dead      |
| 482 | Breed       | M | N | 0.2  | Not up to date | Cold | Infectious     | Gastroenteritis | Parvovirus    | Y | Discharge | 1 Discharge |
| 483 | Breed       | F | N | 0.2  | Not up to date | Cold | Infectious     | Gastroenteritis | Parvovirus    | Y | Discharge | 1 Discharge |
| 484 | Breed       | M | N | 0.3  | Not up to date | Cold | Infectious     | Gastroenteritis | Parvovirus    | Y | Discharge | 1 Discharge |
| 485 | Breed       | F | N | 12.0 | Up to date     | Cold | Suspect        | Leptospirosis   |               | Y | Dead      | 1           |
| 486 | Mixed Breed | M | N | 0.2  | Not up to date | Cold | Suspect        | Leptospirosis   |               | N | Discharge | 1           |
| 487 | Breed       | F | N | 12.0 | Not up to date | Cold | Suspect        | Others          |               | Y | Discharge | 1           |
| 488 | Breed       | F | N | 6.0  | Not up to date | Cold | Infectious     | Gastroenteritis | Parvovirus    | N | Discharge | 1 Discharge |
| 489 | Mixed Breed | F | N | 0.2  | Not up to date | Cold | Infectious     | Gastroenteritis | Parvovirus    | Y | Discharge | 1 Discharge |
| 490 | Breed       | F | N | 6.0  | Not up to date | Cold | Infectious     | Gastroenteritis | Parvovirus    | N | Discharge | 1 Discharge |
| 491 | Breed       | F | Y | 12.0 | Up to date     | Cold | Suspect        | MDR             |               | Y | Discharge | 1           |
| 492 | Breed       | F | N | 0.3  | Not up to date | Cold | Suspect        | Distemper       |               | N | Discharge | 1           |
| 493 | Mixed Breed | M | N | 5.0  | Up to date     | Cold | Suspect        | Leptospirosis   |               | N | Discharge | 1           |
| 494 | Mixed Breed | F | Y | 13.0 | Not up to date | Cold | Not Infectious | Leptospirosis   |               | Y | Dead      | 1           |
| 495 | Breed       | F | N | 0.3  | Not up to date | Cold | Infectious     | Gastroenteritis | Parvovirus    | Y | Discharge | 1 Discharge |
| 496 | Mixed Breed | M | N | 0.2  | Not up to date | Cold | Infectious     | Gastroenteritis | Parvovirus    | Y | Discharge | 1 Discharge |
| 497 | Breed       | M | N | 8.0  | Not up to date | Cold | Infectious     | MDR             | MDR           | Y | Discharge | 1 Dead      |
| 498 | Mixed Breed | M | Y | 3.0  | Not up to date | Cold | Infectious     | Gastroenteritis | Parvovirus    | Y | Dead      | 1 Dead      |
| 499 | Breed       | M | Y | 6.0  | Not up to date | Cold | Not Infectious | Leptospirosis   |               | Y | Discharge | 1           |
| 500 | Breed       | M | N | 0.2  | Not up to date | Cold | Suspect        | Distemper       |               | N | Discharge | 1           |
| 501 | Breed       | M | N | 0.4  | Not up to date | Cold | Infectious     | Gastroenteritis | Parvovirus    | N | Discharge | 1 Discharge |
| 502 | Breed       | F | Y | 11.0 | Up to date     | Cold | Suspect        | Leptospirosis   |               | Y | Discharge | 1           |
| 503 | Breed       | M | N | 8.0  | Not up to date | Cold | Suspect        | Leptospirosis   |               | Y | Discharge | 1           |
| 504 | Breed       | F | Y | 14.0 | Not up to date | Cold | Not Infectious | Leptospirosis   |               | Y | Discharge | 1           |
| 505 | Breed       | F | N | 10.0 | Not up to date | Warm | Suspect        | Gastroenteritis |               | N | Discharge | 1           |
| 506 | Mixed Breed | F | Y | 2.0  | Up to date     | Warm | Suspect        | Others          |               | N | Discharge | 1           |
| 507 | Breed       | M | N | 4.0  | Not up to date | Warm | Not Infectious | Leptospirosis   |               | Y | Discharge | 1           |
| 508 | Breed       | F | N | 0.2  | Not up to date | Warm | Infectious     | Gastroenteritis | Parvovirus    | N | Dead      | 1 Dead      |
| 509 | Breed       | M | N | 11.0 | Not up to date | Warm | Infectious     | MDR             | MDR           | Y | Discharge | 1 Discharge |
| 510 | Breed       | F | Y | 13.0 | Not up to date | Warm | Not Infectious | Leptospirosis   |               | Y | Discharge | 1           |
| 511 | Mixed Breed | F | Y | 15.0 | Not up to date | Warm | Suspect        | Others          |               | Y | Discharge | 1           |
| 512 | Breed       | F | N | 0.2  | Not up to date | Warm | Suspect        | Gastroenteritis |               | Y | Discharge | 1           |
| 513 | Mixed Breed | M | N | 0.3  | Not up to date | Warm | Suspect        | Gastroenteritis |               | Y | Discharge | 1           |
| 514 | Breed       | M | Y | 7.0  | Not up to date | Warm | Suspect        | Leptospirosis   |               | Y | Dead      | 1           |
| 515 | Breed       | F | N | 0.3  | Not up to date | Warm | Infectious     | Gastroenteritis | Parvovirus    | N | Discharge | 1 Discharge |
| 516 | Breed       | F | N | 12.0 | Up to date     | Warm | Not Infectious | Distemper       |               | Y | Dead      | 1           |
| 517 | Mixed Breed | F | N | 11.0 | Not up to date | Warm | Suspect        | MDR             |               | Y | Dead      | 1           |
| 518 | Breed       | F | N | 11.0 | Not up to date | Warm | Suspect        | Others          |               | Y | Dead      | 1           |
| 519 | Breed       | M | N | 0.2  | Not up to date | Warm | Infectious     | Gastroenteritis | Parvovirus    | Y | Dead      | 1 Dead      |
| 520 | Breed       | M | N | 2.0  | Not up to date | Warm | Suspect        | Gastroenteritis |               | Y | Dead      | 1           |
| 521 | Breed       | F | N | 0.3  | Not up to date | Warm | Infectious     | Gastroenteritis | Parvovirus    | Y | Discharge | 1 Discharge |
| 522 | Breed       | F | N | 0.3  | Not up to date | Warm | Infectious     | Gastroenteritis | Parvovirus    | Y | Discharge | 1 Discharge |
| 523 | Breed       | F | N | 0.2  | Not up to date | Warm | Infectious     | Gastroenteritis | Parvovirus    | N | Dead      | 1 Dead      |
| 524 | Breed       | M | N | 6.0  | Not up to date | Warm | Suspect        | Leptospirosis   |               | Y | Discharge | 1           |
| 525 | Mixed Breed | F | N | 0.2  | Not up to date | Warm | Suspect        | Distemper       |               | Y | Discharge | 1           |
| 526 | Breed       | M | N | 0.3  | Not up to date | Warm | Suspect        | Gastroenteritis |               | Y | Discharge | 1           |
| 527 | Breed       | F | N | 0.4  | Up to date     | Warm | Suspect        | Gastroenteritis |               | N | Discharge | 1           |
| 528 | Mixed Breed | F | N | 0.5  | Not up to date | Warm | Suspect        | Gastroenteritis |               | N | Discharge | 1           |
| 529 | Breed       | F | N | 10.0 | Not up to date | Warm | Suspect        | Leptospirosis   |               | N | Dead      | 1           |
| 530 | Breed       | M | N | 0.3  | Not up to date | Warm | Suspect        | Leptospirosis   |               | N | Discharge | 1           |
| 531 | Mixed Breed | F | Y | 10.0 | Not up to date | Warm | Suspect        | Leptospirosis   |               | Y | Discharge | 1           |
| 532 | Mixed Breed | M | Y | 13.0 | Up to date     | Warm | Infectious     | MDR             | MDR           | Y | Discharge | 1 Discharge |
| 533 | Breed       | M | N | 0.2  | Not up to date | Warm | Infectious     | Gastroenteritis | Parvovirus    | N | Dead      | 1 Dead      |
| 534 | Breed       | F | N | 0.3  | Not up to date | Warm | Infectious     | Gastroenteritis | Parvovirus    | N | Discharge | 1 Discharge |
